# Supplementary material
Source: PubMed Central journal article supplement (PMC6792357)
Supplement: ehp-127-097006-s001.pdf [file ehp-127-097006-s001.pdf]

**Note to readers with disabilities:** *EHP* strives to ensure that all journal content is accessible to all readers. However, some figures and Supplemental Material published in *EHP* articles may not conform to [508 standards](#) due to the complexity of the information being presented. If you need assistance accessing journal content, please contact [ehp508@niehs.nih.gov](mailto:ehp508@niehs.nih.gov). Our staff will work with you to assess and meet your accessibility needs within 3 working days.

### **Supplemental Material**

#### **Pediatric Psychiatric Emergency Department Utilization and Fine Particulate Matter: A Case-Crossover Study**

Cole Brokamp, Jeffrey R. Strawn, Andrew F. Beck, and Patrick Ryan

#### **Table of Contents**

**Table S1.** ICD-10 codes from each case's primary diagnosis and their psychiatric category as derived using the Clinical Classification Software (CCS) and DSM-5 nosology. A board-certified child and adolescent psychiatrist (JRS) familiar with the institutional practices of ICD coding/documentation reviewed the excluded or altered codes based on both (1) current clinical practice and (2) current child and adolescent psychiatry diagnostic formulation. Some ICD-10 codes were not assigned to any category (e.g. alcohol-related disorders, cognitive disorders) because we did not believe that they represented an acute exacerbation that could have been possibly caused by an acute chemical insult.

**Table S2.** Inclusion criteria and number of cases meeting each criterion.

**Table S3.** Odds ratios and 95% confidence intervals from the case-crossover modeling for the risk of a psychiatric ED visit related to a  $10 \mu\text{g}/\text{m}^3$  increase in  $\text{PM}_{2.5}$  overall and by psychiatric ED visit categories. Results are presented using 30, 45, and 60 day fixed length periods to stratify and select control windows for each case window.

**Table S4.** P-values from a Chi-squared test used to determine if community deprivation significantly modified the association between  $\text{PM}_{2.5}$  and psychiatric ED visits by category. Separate associations for high and low community deprivation were estimated for outcomes only when there was significant modification ( $p < 0.05$ ) for at least one exposure lag. Lags represent lagged exposures in days.

**Table S5.** Odds ratios and 95% confidence intervals from the case-crossover modeling for the risk of a psychiatric ED visit related to a  $10 \mu\text{g}/\text{m}^3$  increase in  $\text{PM}_{2.5}$  stratified by community deprivation. Separate associations by high and low community deprivation were estimated for psychiatric ED visit categories that showed a significant effect modification ( $p < 0.05$ ) for at least one exposure lag, in accord with a pre-specified selection criterion.

## Supplementary Information

**Table S1:** ICD-10 codes from each case's primary diagnosis and their psychiatric category as derived using the Clinical Classification Software (CCS) and DSM-5 nosology. A board-certified child and adolescent psychiatrist (JRS) familiar with the institutional practices of ICD coding/documentation reviewed the excluded or altered codes based on both (1) current clinical practice and (2) current child and adolescent psychiatry diagnostic formulation. Some ICD-10 codes were not assigned to any category (e.g. alcohol-related disorders, cognitive disorders) because we did not believe that they represented an acute exacerbation that could have been possibly caused by an acute chemical insult.

| CCS Category              | ICD-10  | ICD Description                                              | Psychiatric Category |
|---------------------------|---------|--------------------------------------------------------------|----------------------|
| Adjustment disorders      | F43.20  | Adjustment disorder, unspecified                             | adjustment disorder  |
| Adjustment disorders      | F43.21  | Adjustment disorder with depressed mood                      | adjustment disorder  |
| Adjustment disorders      | F43.22  | Adjustment disorder with anxiety                             | adjustment disorder  |
| Adjustment disorders      | F43.23  | Adjustment disorder with mixed anxiety and depressed mood    | adjustment disorder  |
| Adjustment disorders      | F43.24  | Adjustment disorder with disturbance of conduct              | adjustment disorder  |
| Adjustment disorders      | F43.25  | Adjustment disorder w mixed disturb of emotions and conduct  | adjustment disorder  |
| Adjustment disorders      | F43.29  | Adjustment disorder with other symptoms                      | adjustment disorder  |
| Adjustment disorders      | F43.8   | Other reactions to severe stress                             | adjustment disorder  |
| Adjustment disorders      | F43.9   | Reaction to severe stress, unspecified                       | adjustment disorder  |
| Alcohol-related disorders | F10.10  | Alcohol abuse, uncomplicated                                 |                      |
| Alcohol-related disorders | F10.120 | Alcohol abuse with intoxication, uncomplicated               |                      |
| Alcohol-related disorders | F10.129 | Alcohol abuse with intoxication, unspecified                 |                      |
| Alcohol-related disorders | F10.20  | Alcohol dependence, uncomplicated                            |                      |
| Alcohol-related disorders | F10.229 | Alcohol dependence with intoxication, unspecified            |                      |
| Alcohol-related disorders | F10.950 | Alcohol use, unsp w alcoh-induce psych disorder w delusions  |                      |
| Alcohol-related disorders | F10.988 | Alcohol use, unspecified with other alcohol-induced disorder |                      |
| Alcohol-related disorders | Q86.0   | Fetal alcohol syndrome (dysmorphic)                          |                      |
| Anxiety disorders         | F40.00  | Agoraphobia, unspecified                                     | anxiety              |
| Anxiety disorders         | F40.01  | Agoraphobia with panic disorder                              | anxiety              |
| Anxiety disorders         | F40.10  | Social phobia, unspecified                                   | anxiety              |
| Anxiety disorders         | F40.11  | Social phobia, generalized                                   | anxiety              |
| Anxiety disorders         | F40.298 | Other specified phobia                                       | anxiety              |
| Anxiety disorders         | F41.0   | Panic disorder without agoraphobia                           | anxiety              |
| Anxiety disorders         | F41.1   | Generalized anxiety disorder                                 | anxiety              |
| Anxiety disorders         | F41.3   | Other mixed anxiety disorders                                | anxiety              |
| Anxiety disorders         | F41.8   | Other specified anxiety disorders                            | anxiety              |
| Anxiety disorders         | F41.9   | Anxiety disorder, unspecified                                | anxiety              |
| Anxiety disorders         | F42     | Obsessive-compulsive disorder                                |                      |

|                                                             |        |                                                                   |                        |
|-------------------------------------------------------------|--------|-------------------------------------------------------------------|------------------------|
| Anxiety disorders                                           | F42.9  | Obsessive-compulsive disorder, unspecified                        |                        |
| Anxiety disorders                                           | F43.0  | Acute stress reaction                                             | ptsd                   |
| Anxiety disorders                                           | F43.10 | Post-traumatic stress disorder, unspecified                       | ptsd                   |
| Anxiety disorders                                           | F43.11 | Post-traumatic stress disorder, acute                             | ptsd                   |
| Anxiety disorders                                           | F43.12 | Post-traumatic stress disorder, chronic                           | ptsd                   |
| Anxiety disorders                                           | F48.8  | Other specified nonpsychotic mental disorders                     |                        |
| Anxiety disorders                                           | F48.9  | Nonpsychotic mental disorder, unspecified                         |                        |
| Anxiety disorders                                           | R45.4  | Irritability and anger                                            |                        |
| Anxiety disorders                                           | R45.5  | Hostility                                                         |                        |
| Anxiety disorders                                           | R45.6  | Violent behavior                                                  |                        |
| Anxiety disorders                                           | R45.7  | State of emotional shock and stress, unspecified                  |                        |
| Anxiety disorders                                           | R45.83 | Excessive crying of child, adolescent or adult                    |                        |
| Attention deficit conduct and disruptive behavior disorders | F90.0  | Attn-defct hyperactivity disorder, predominately inattentive type | externalizing disorder |
| Attention deficit conduct and disruptive behavior disorders | F90.1  | Attn-defct hyperactivity disorder, predominately hyperactive type | externalizing disorder |
| Attention deficit conduct and disruptive behavior disorders | F90.2  | Attention-deficit hyperactivity disorder, combined type           | externalizing disorder |
| Attention deficit conduct and disruptive behavior disorders | F90.8  | Attention-deficit hyperactivity disorder, other type              | externalizing disorder |
| Attention deficit conduct and disruptive behavior disorders | F90.9  | Attention-deficit hyperactivity disorder, unspecified type        | externalizing disorder |
| Attention deficit conduct and disruptive behavior disorders | F91.1  | Conduct disorder, childhood-onset type                            | externalizing disorder |
| Attention deficit conduct and disruptive behavior disorders | F91.2  | Conduct disorder, adolescent-onset type                           | externalizing disorder |
| Attention deficit conduct and disruptive behavior disorders | F91.3  | Oppositional defiant disorder                                     | externalizing disorder |
| Attention deficit conduct and disruptive behavior disorders | F91.8  | Other conduct disorders                                           | externalizing disorder |
| Attention deficit conduct and disruptive behavior disorders | F91.9  | Conduct disorder, unspecified                                     | externalizing disorder |
| Attention deficit conduct and disruptive behavior disorders | R46.89 | Other symptoms and signs involving appearance and behavior        | externalizing disorder |
| Delirium dementia and amnesic and other cognitive disorders | F05    | Delirium due to known physiological condition                     |                        |
| Delirium dementia and                                       | F07.0  | Personality change due to known                                   |                        |

|                                                                 |        |                                                            |                        |
|-----------------------------------------------------------------|--------|------------------------------------------------------------|------------------------|
| amnesic and other cognitive disorders                           |        | physiological condition                                    |                        |
| Delirium dementia and amnesic and other cognitive disorders     | F07.81 | Postconcussional syndrome                                  |                        |
| Delirium dementia and amnesic and other cognitive disorders     | F09    | Unsp mental disorder due to known physiological condition  |                        |
| Developmental disorders                                         | F79    | Unspecified intellectual disabilities                      |                        |
| Developmental disorders                                         | F80.0  | Phonological disorder                                      |                        |
| Developmental disorders                                         | F80.1  | Expressive language disorder                               |                        |
| Developmental disorders                                         | F80.2  | Mixed receptive-expressive language disorder               |                        |
| Developmental disorders                                         | F80.81 | Childhood onset fluency disorder                           |                        |
| Developmental disorders                                         | F80.89 | Other developmental disorders of speech and language       |                        |
| Developmental disorders                                         | F80.9  | Developmental disorder of speech and language, unspecified |                        |
| Developmental disorders                                         | F82    | Specific developmental disorder of motor function          |                        |
| Developmental disorders                                         | F88    | Other disorders of psychological development               |                        |
| Disorders usually diagnosed in infancy childhood or adolescence | F64.2  | Gender identity disorder of childhood                      |                        |
| Disorders usually diagnosed in infancy childhood or adolescence | F84.0  | Autistic disorder                                          | developmental disorder |
| Disorders usually diagnosed in infancy childhood or adolescence | F84.5  | Aspergers syndrome                                         | developmental disorder |
| Disorders usually diagnosed in infancy childhood or adolescence | F84.8  | Other pervasive developmental disorders                    | developmental disorder |
| Disorders usually diagnosed in infancy childhood or adolescence | F84.9  | Pervasive developmental disorder, unspecified              |                        |
| Disorders usually diagnosed in infancy childhood or adolescence | F93.0  | Separation anxiety disorder of childhood                   | anxiety                |
| Disorders usually diagnosed in infancy childhood or adolescence | F93.8  | Other childhood emotional disorders                        |                        |
| Disorders usually diagnosed in infancy                          | F93.9  | Childhood emotional disorder, unspecified                  |                        |

|                                                                 |        |                                                              |  |
|-----------------------------------------------------------------|--------|--------------------------------------------------------------|--|
| childhood or adolescence                                        |        |                                                              |  |
| Disorders usually diagnosed in infancy childhood or adolescence | F94.0  | Selective mutism                                             |  |
| Disorders usually diagnosed in infancy childhood or adolescence | F94.1  | Reactive attachment disorder of childhood                    |  |
| Disorders usually diagnosed in infancy childhood or adolescence | F94.2  | Disinhibited attachment disorder of childhood                |  |
| Disorders usually diagnosed in infancy childhood or adolescence | F95.1  | Chronic motor or vocal tic disorder                          |  |
| Disorders usually diagnosed in infancy childhood or adolescence | F95.2  | Tourettes disorder                                           |  |
| Disorders usually diagnosed in infancy childhood or adolescence | F95.8  | Other tic disorders                                          |  |
| Disorders usually diagnosed in infancy childhood or adolescence | F95.9  | Tic disorder, unspecified                                    |  |
| Disorders usually diagnosed in infancy childhood or adolescence | F98.0  | Enuresis not due to a substance or known physiol condition   |  |
| Disorders usually diagnosed in infancy childhood or adolescence | F98.1  | Encopresis not due to a substance or known physiol condition |  |
| Disorders usually diagnosed in infancy childhood or adolescence | F98.21 | Rumination disorder of infancy                               |  |
| Disorders usually diagnosed in infancy childhood or adolescence | F98.29 | Other feeding disorders of infancy and early childhood       |  |
| Disorders usually diagnosed in infancy childhood or adolescence | F98.4  | Stereotyped movement disorders                               |  |
| Disorders usually diagnosed in infancy childhood or adolescence | F98.8  | Oth behav/emotn disord w onset usly occur in chldhd and adol |  |
| Disorders usually diagnosed in infancy                          | F98.9  | Unsp behav/emotn disord w onst usly occur in chldhd and adol |  |

|                                                    |         |                                                         |                          |
|----------------------------------------------------|---------|---------------------------------------------------------|--------------------------|
| childhood or adolescence                           |         |                                                         |                          |
| Impulse control disorders not elsewhere classified | F63.1   | Pyromania                                               | impulse control disorder |
| Impulse control disorders not elsewhere classified | F63.81  | Intermittent explosive disorder                         | impluse control disorder |
| Impulse control disorders not elsewhere classified | F63.89  | Other impulse disorders                                 | impluse control disorder |
| Impulse control disorders not elsewhere classified | F63.9   | Impulse disorder, unspecified                           | impluse control disorder |
| Impulse control disorders not elsewhere classified | R45.850 | Homicidal ideations                                     | impluse control disorder |
| Miscellaneous mental disorders                     | F44.4   | Conversion disorder with motor symptom or deficit       |                          |
| Miscellaneous mental disorders                     | F44.5   | Conversion disorder with seizures or convulsions        |                          |
| Miscellaneous mental disorders                     | F44.6   | Conversion disorder with sensory symptom or deficit     |                          |
| Miscellaneous mental disorders                     | F44.89  | Other dissociative and conversion disorders             |                          |
| Miscellaneous mental disorders                     | F44.9   | Dissociative and conversion disorder, unspecified       |                          |
| Miscellaneous mental disorders                     | F45.8   | Other somatoform disorders                              |                          |
| Miscellaneous mental disorders                     | F45.9   | Somatoform disorder, unspecified                        |                          |
| Miscellaneous mental disorders                     | F50.00  | Anorexia nervosa, unspecified                           |                          |
| Miscellaneous mental disorders                     | F50.01  | Anorexia nervosa, restricting type                      |                          |
| Miscellaneous mental disorders                     | F50.02  | Anorexia nervosa, binge eating/purging type             |                          |
| Miscellaneous mental disorders                     | F50.2   | Bulimia nervosa                                         |                          |
| Miscellaneous mental disorders                     | F50.8   | Other eating disorders                                  |                          |
| Miscellaneous mental disorders                     | F50.89  | Other specified eating disorder                         |                          |
| Miscellaneous mental disorders                     | F50.9   | Eating disorder, unspecified                            |                          |
| Miscellaneous mental disorders                     | F51.3   | Sleepwalking [somnambulism]                             |                          |
| Miscellaneous mental disorders                     | F51.4   | Sleep terrors [night terrors]                           |                          |
| Miscellaneous mental disorders                     | F51.5   | Nightmare disorder                                      |                          |
| Miscellaneous mental disorders                     | F51.8   | Oth sleep disord not due to a sub or known physiol cond |                          |
| Miscellaneous mental disorders                     | F53     | Puerperal psychosis                                     |                          |

|                                |        |                                                              |                  |
|--------------------------------|--------|--------------------------------------------------------------|------------------|
| Miscellaneous mental disorders | F54    | Psych & behavrl factors assoc w disord or dis classd elswhr  |                  |
| Miscellaneous mental disorders | F64.1  | Dual role transvestism                                       |                  |
| Miscellaneous mental disorders | F68.10 | Factitious disorder, unspecified                             |                  |
| Miscellaneous mental disorders | F99    | Mental disorder, not otherwise specified                     |                  |
| Miscellaneous mental disorders | R45.89 | Other symptoms and signs involving emotional state           |                  |
| Mood disorders                 | F06.30 | Mood disorder due to known physiological condition, unsp     |                  |
| Mood disorders                 | F06.31 | Mood disorder due to known physiol cond w depressv features  |                  |
| Mood disorders                 | F30.2  | Manic episode, severe with psychotic symptoms                | bipolar disorder |
| Mood disorders                 | F30.8  | Other manic episodes                                         | bipolar disorder |
| Mood disorders                 | F30.9  | Manic episode, unspecified                                   | bipolar disorder |
| Mood disorders                 | F31.0  | Bipolar disorder, current episode hypomanic                  | bipolar disorder |
| Mood disorders                 | F31.10 | Bipolar disord, crnt episode manic w/o psych features, unsp  | bipolar disorder |
| Mood disorders                 | F31.12 | Bipolar disord, crnt episode manic w/o psych features, mod   | bipolar disorder |
| Mood disorders                 | F31.13 | Bipolar disord, crnt epsd manic w/o psych features, severe   | bipolar disorder |
| Mood disorders                 | F31.2  | Bipolar disord, crnt episode manic severe w psych features   | bipolar disorder |
| Mood disorders                 | F31.30 | Bipolar disord, crnt epsd depress, mild or mod severt, unsp  | bipolar disorder |
| Mood disorders                 | F31.31 | Bipolar disorder, current episode depressed, mild            | bipolar disorder |
| Mood disorders                 | F31.32 | Bipolar disorder, current episode depressed, moderate        | bipolar disorder |
| Mood disorders                 | F31.4  | Bipolar disord, crnt epsd depress, sev, w/o psych features   | bipolar disorder |
| Mood disorders                 | F31.5  | Bipolar disord, crnt epsd depress, severe, w psych features  | bipolar disorder |
| Mood disorders                 | F31.60 | Bipolar disorder, current episode mixed, unspecified         | bipolar disorder |
| Mood disorders                 | F31.61 | Bipolar disorder, current episode mixed, mild                | bipolar disorder |
| Mood disorders                 | F31.62 | Bipolar disorder, current episode mixed, moderate            | bipolar disorder |
| Mood disorders                 | F31.63 | Bipolar disord, crnt epsd mixed, severe, w/o psych features  | bipolar disorder |
| Mood disorders                 | F31.64 | Bipolar disord, crnt episode mixed, severe, w psych features | bipolar disorder |
| Mood disorders                 | F31.70 | Bipolar disord, currently in remis, most recent episode unsp | bipolar disorder |
| Mood disorders                 | F31.73 | Bipolar disord, in partial remis, most recent episode manic  | bipolar disorder |
| Mood disorders                 | F31.75 | Bipolar disord, in partial remis, most recent epsd depress   | Bipolar disorder |

|                                             |        |                                                              |                      |
|---------------------------------------------|--------|--------------------------------------------------------------|----------------------|
| Mood disorders                              | F31.77 | Bipolar disord, in partial remis, most recent episode mixed  | bipolar disorder     |
| Mood disorders                              | F31.81 | Bipolar II disorder                                          | bipolar disorder     |
| Mood disorders                              | F31.89 | Other bipolar disorder                                       | bipolar disorder     |
| Mood disorders                              | F31.9  | Bipolar disorder, unspecified                                | bipolar disorder     |
| Mood disorders                              | F32.0  | Major depressive disorder, single episode, mild              | depressive disorder  |
| Mood disorders                              | F32.1  | Major depressive disorder, single episode, moderate          | depressive disorder  |
| Mood disorders                              | F32.2  | Major depressv disord, single epsd, sev w/o psych features   | depressive disorder  |
| Mood disorders                              | F32.3  | Major depressv disord, single epsd, severe w psych features  | depressive disorder  |
| Mood disorders                              | F32.5  | Major depressive disorder, single episode, in full remission | depressive disorder  |
| Mood disorders                              | F32.8  | Other depressive episodes                                    | depressive disorder  |
| Mood disorders                              | F32.89 | Other specified depressive episodes                          | depressive disorder  |
| Mood disorders                              | F32.9  | Major depressive disorder, single episode, unspecified       | depressive disorder  |
| Mood disorders                              | F33.0  | Major depressive disorder, recurrent, mild                   | depressive disorder  |
| Mood disorders                              | F33.1  | Major depressive disorder, recurrent, moderate               | depressive disorder  |
| Mood disorders                              | F33.2  | Major depressv disorder, recurrent severe w/o psych features | depressive disorder  |
| Mood disorders                              | F33.3  | Major depressv disorder, recurrent, severe w psych symptoms  | depressive disorder  |
| Mood disorders                              | F33.40 | Major depressive disorder, recurrent, in remission, unsp     | depressive disorder  |
| Mood disorders                              | F33.8  | Other recurrent depressive disorders                         | depressive disorder  |
| Mood disorders                              | F33.9  | Major depressive disorder, recurrent, unspecified            | depressive disorder  |
| Mood disorders                              | F34.0  | Cyclothymic disorder                                         | depressive disorder  |
| Mood disorders                              | F34.1  | Dysthymic disorder                                           | depressive disorder  |
| Mood disorders                              | F34.8  | Other persistent mood [affective] disorders                  | other mood disorder  |
| Mood disorders                              | F34.81 | Disruptive mood dysregulation disorder                       | other mood disorder  |
| Mood disorders                              | F34.89 | Other specified persistent mood disorders                    | other mood disorder  |
| Mood disorders                              | F34.9  | Persistent mood [affective] disorder, unspecified            | other mood disorder  |
| Mood disorders                              | F39    | Unspecified mood [affective] disorder                        | other mood disorder  |
| Mood disorders                              | R45.86 | Emotional lability                                           |                      |
| Personality disorders                       | F60.3  | Borderline personality disorder                              | personality disorder |
| Personality disorders                       | F60.89 | Other specific personality disorders                         | personality disorder |
| Personality disorders                       | F60.9  | Personality disorder, unspecified                            | personality disorder |
| Schizophrenia and other psychotic disorders | F06.0  | Psychotic disorder w hallucin due to known physiol condition |                      |
| Schizophrenia and other psychotic disorders | F20.0  | Paranoid schizophrenia                                       | schizophrenia        |
| Schizophrenia and other psychotic           | F20.1  | Disorganized schizophrenia                                   | schizophrenia        |



|                                                                  |        |                                                             |               |
|------------------------------------------------------------------|--------|-------------------------------------------------------------|---------------|
| disorders                                                        |        |                                                             |               |
| Schizophrenia and other psychotic disorders                      | F20.2  | Catatonic schizophrenia                                     | schizophrenia |
| Schizophrenia and other psychotic disorders                      | F20.3  | Undifferentiated schizophrenia                              | schizophrenia |
| Schizophrenia and other psychotic disorders                      | F20.5  | Residual schizophrenia                                      | schizophrenia |
| Schizophrenia and other psychotic disorders                      | F20.81 | Schizophreniform disorder                                   | schizophrenia |
| Schizophrenia and other psychotic disorders                      | F20.89 | Other schizophrenia                                         | schizophrenia |
| Schizophrenia and other psychotic disorders                      | F20.9  | Schizophrenia, unspecified                                  | schizophrenia |
| Schizophrenia and other psychotic disorders                      | F22    | Delusional disorders                                        | schizophrenia |
| Schizophrenia and other psychotic disorders                      | F23    | Brief psychotic disorder                                    | schizophrenia |
| Schizophrenia and other psychotic disorders                      | F24    | Shared psychotic disorder                                   | schizophrenia |
| Schizophrenia and other psychotic disorders                      | F25.0  | Schizoaffective disorder, bipolar type                      | schizophrenia |
| Schizophrenia and other psychotic disorders                      | F25.1  | Schizoaffective disorder, depressive type                   | schizophrenia |
| Schizophrenia and other psychotic disorders                      | F25.8  | Other schizoaffective disorders                             | schizophrenia |
| Schizophrenia and other psychotic disorders                      | F25.9  | Schizoaffective disorder, unspecified                       | schizophrenia |
| Schizophrenia and other psychotic disorders                      | F28    | Oth psych disorder not due to a sub or known physiol cond   |               |
| Schizophrenia and other psychotic disorders                      | F29    | Unsp psychosis not due to a substance or known physiol cond | schizophrenia |
| Screening and history of mental health and substance abuse codes | Z04.6  | Encntr for general psychiatric exam, requested by authority |               |
| Screening and history of mental health and substance abuse codes | Z86.59 | Personal history of other mental and behavioral disorders   |               |
| Substance-related                                                | F11.10 | Opioid abuse, uncomplicated                                 |               |

|                             |         |                                                              |  |
|-----------------------------|---------|--------------------------------------------------------------|--|
| disorders                   |         |                                                              |  |
| Substance-related disorders | F11.20  | Opioid dependence, uncomplicated                             |  |
| Substance-related disorders | F11.23  | Opioid dependence with withdrawal                            |  |
| Substance-related disorders | F12.10  | Cannabis abuse, uncomplicated                                |  |
| Substance-related disorders | F12.120 | Cannabis abuse with intoxication, uncomplicated              |  |
| Substance-related disorders | F12.20  | Cannabis dependence, uncomplicated                           |  |
| Substance-related disorders | F12.251 | Cannabis dependence w psychotic disorder with hallucinations |  |
| Substance-related disorders | F12.90  | Cannabis use, unspecified, uncomplicated                     |  |
| Substance-related disorders | F12.920 | Cannabis use, unspecified with intoxication, uncomplicated   |  |
| Substance-related disorders | F12.921 | Cannabis use, unspecified with intoxication delirium         |  |
| Substance-related disorders | F12.929 | Cannabis use, unspecified with intoxication, unspecified     |  |
| Substance-related disorders | F12.951 | Cannabis use, unsp w psychotic disorder with hallucinations  |  |
| Substance-related disorders | F12.988 | Cannabis use, unsp with other cannabis-induced disorder      |  |
| Substance-related disorders | F13.20  | Sedative, hypnotic or anxiolytic dependence, uncomplicated   |  |
| Substance-related disorders | F14.10  | Cocaine abuse, uncomplicated                                 |  |
| Substance-related disorders | F16.10  | Hallucinogen abuse, uncomplicated                            |  |
| Substance-related disorders | F16.129 | Hallucinogen abuse with intoxication, unspecified            |  |
| Substance-related disorders | F19.10  | Other psychoactive substance abuse, uncomplicated            |  |
| Substance-related disorders | F19.20  | Other psychoactive substance dependence, uncomplicated       |  |
| Substance-related disorders | F19.90  | Other psychoactive substance use, unspecified, uncomplicated |  |
| Substance-related disorders | F19.920 | Oth psychoactive substance use, unsp w intoxication, uncomp  |  |
| Substance-related disorders | F19.921 | Oth psychoactive substance use, unsp w intox w delirium      |  |
| Substance-related disorders | F19.939 | Other psychoactive substance use, unsp with withdrawal, unsp |  |
| Substance-related disorders | F19.94  | Oth psychoactive substance use, unsp w mood disorder         |  |
| Substance-related disorders | F19.951 | Oth psychoactv sub use, unsp w psych disorder w hallucin     |  |
| Substance-related disorders | F19.988 | Oth psychoactive substance use, unsp w oth disorder          |  |
| Substance-related disorders | F19.99  | Oth psychoactive substance use, unsp w unsp disorder         |  |
| Substance-related disorders | P04.49  | Newborn affected by maternal use of other drugs of addiction |  |

|                                               |          |                                                               |         |
|-----------------------------------------------|----------|---------------------------------------------------------------|---------|
| Substance-related disorders                   | P96.1    | Neonatal w/drawal symp from matern use of drugs of addiction  |         |
| Substance-related disorders                   | T40.0X1A | Poisoning by opium, accidental (unintentional), init encntr   |         |
| Substance-related disorders                   | T40.1X4A | Poisoning by heroin, undetermined, initial encounter          |         |
| Substance-related disorders                   | T40.5X4A | Poisoning by cocaine, undetermined, initial encounter         |         |
| Substance-related disorders                   | T40.7X1A | Poisoning by cannabis (derivatives), accidental, init         |         |
| Substance-related disorders                   | T40.7X4A | Poisoning by cannabis (derivatives), undetermined, init       |         |
| Substance-related disorders                   | T40.8X1A | Poisoning by lysergide, accidental (unintentional), init      |         |
| Substance-related disorders                   | T40.8X4A | Poisoning by lysergide, undetermined, initial encounter       |         |
| Substance-related disorders                   | T40.904A | Poisoning by unsp psychodysleptics, undetermined, init        |         |
| Suicide and intentional self-inflicted injury | R45.851  | Suicidal ideations                                            | suicide |
| Suicide and intentional self-inflicted injury | T14.91   | Suicide attempt                                               | suicide |
| Suicide and intentional self-inflicted injury | T36.1X2A | Poison by cephalospor/oth beta-lactm antibiot, slf-hrm, init  | suicide |
| Suicide and intentional self-inflicted injury | T37.5X2A | Poisoning by antiviral drugs, intentional self-harm, init     | suicide |
| Suicide and intentional self-inflicted injury | T38.1X2A | Poisoning by thyroid hormones and sub, self-harm, init        | suicide |
| Suicide and intentional self-inflicted injury | T38.3X2A | Poison by insulin and oral hypoglycemic drugs, slf-hrm, init  | suicide |
| Suicide and intentional self-inflicted injury | T39.012A | Poisoning by aspirin, intentional self-harm, init encntr      | suicide |
| Suicide and intentional self-inflicted injury | T39.1X2A | Poisoning by 4-Aminophenol derivatives, self-harm, init       | suicide |
| Suicide and intentional self-inflicted injury | T39.1X2D | Poisoning by 4-Aminophenol derivatives, self-harm, subs       | suicide |
| Suicide and intentional self-inflicted injury | T39.312A | Poisoning by propionic acid derivatives, self-harm, init      | suicide |
| Suicide and intentional self-inflicted injury | T39.392A | Poison by oth nonsteroid anti-inflam drugs, self-harm, init   | suicide |
| Suicide and intentional self-inflicted injury | T39.8X2A | Poison by oth nonopio analges/antipyret, NEC, self-harm, init | suicide |
| Suicide and intentional self-inflicted injury | T39.92XA | Poison by unsp nonopi analgs/antipyr/antirheu, slf-hrm, init  | suicide |
| Suicide and intentional self-inflicted injury | T40.2X2A | Poisoning by oth opioids, intentional self-harm, init encntr  | suicide |
| Suicide and intentional self-inflicted injury | T40.4X2A | Poisoning by oth synthetic narcotics, self-harm, init         | suicide |
| Suicide and intentional self-inflicted injury | T40.7X2A | Poisoning by cannabis (derivatives), self-harm, init          | suicide |
| Suicide and intentional self-inflicted injury | T40.8X2A | Poisoning by lysergide, intentional self-harm, init encntr    | suicide |
| Suicide and intentional self-inflicted injury | T42.4X2A | Poisoning by benzodiazepines, intentional self-harm, init     | suicide |
| Suicide and intentional self-inflicted injury | T42.6X2A | Poison by oth antieplptc and sed-hypntc                       | suicide |

|                                               |          |                                                                |         |
|-----------------------------------------------|----------|----------------------------------------------------------------|---------|
| self-inflicted injury                         |          | drugs, slf-hrm, init                                           |         |
| Suicide and intentional self-inflicted injury | T42.8X2A | Poison by antiparkns drug/centr musc-tone depr, slf-hrm, init  | suicide |
| Suicide and intentional self-inflicted injury | T43.012A | Poisoning by tricyclic antidepressants, self-harm, init        | suicide |
| Suicide and intentional self-inflicted injury | T43.212A | Poison by slctv seroton/norepineph reup inhibtr, slf-hrm, init | suicide |
| Suicide and intentional self-inflicted injury | T43.222A | Poison by slctv serotonin reuptake inhibtr, self-harm, init    | suicide |
| Suicide and intentional self-inflicted injury | T43.292A | Poisoning by oth antidepressants, self-harm, init              | suicide |
| Suicide and intentional self-inflicted injury | T43.3X2A | Poison by phenothiaz antipsychot/neurolept, self-harm, init    | suicide |
| Suicide and intentional self-inflicted injury | T43.592A | Poisoning by oth antipsychot/neurolept, self-harm, init        | suicide |
| Suicide and intentional self-inflicted injury | T43.612A | Poisoning by caffeine, intentional self-harm, init encntr      | suicide |
| Suicide and intentional self-inflicted injury | T43.622A | Poisoning by amphetamines, intentional self-harm, init         | suicide |
| Suicide and intentional self-inflicted injury | T43.632A | Poisoning by methylphenidate, intentional self-harm, init      | suicide |
| Suicide and intentional self-inflicted injury | T44.3X2A | Poison by oth parasympath and spasmolytics, self-harm, init    | suicide |
| Suicide and intentional self-inflicted injury | T44.7X2A | Poisoning by beta-adrenocpt antagonists, self-harm, init       | suicide |
| Suicide and intentional self-inflicted injury | T44.992A | Poison by oth drug aff the autonm nervous sys, slf-hrm, init   | suicide |
| Suicide and intentional self-inflicted injury | T45.0X2A | Poisoning by antiallerg/antiemetic, self-harm, init            | suicide |
| Suicide and intentional self-inflicted injury | T45.2X2A | Poisoning by vitamins, intentional self-harm, init encntr      | suicide |
| Suicide and intentional self-inflicted injury | T45.4X2A | Poisoning by iron and its compounds, self-harm, init           | suicide |
| Suicide and intentional self-inflicted injury | T46.1X2A | Poisoning by calcium-channel blockers, self-harm, init         | suicide |
| Suicide and intentional self-inflicted injury | T46.4X2A | Poison by angiotens-convert-enzyme inhibtr, self-harm, init    | suicide |
| Suicide and intentional self-inflicted injury | T46.5X2A | Poisoning by oth antihypertensive drugs, self-harm, init       | suicide |
| Suicide and intentional self-inflicted injury | T47.0X2A | Poisoning by histamine H2-receptor blockers, self-harm, init   | suicide |
| Suicide and intentional self-inflicted injury | T47.92XA | Poisoning by unsp agents aff the GI sys, self-harm, init       | suicide |
| Suicide and intentional self-inflicted injury | T48.1X2A | Poisoning by skeletal muscle relaxants, self-harm, init        | suicide |
| Suicide and intentional self-inflicted injury | T48.3X2A | Poisoning by antitussives, intentional self-harm, init         | suicide |
| Suicide and intentional self-inflicted injury | T48.4X2A | Poisoning by expectorants, intentional self-harm, init         | suicide |
| Suicide and intentional self-inflicted injury | T49.0X2A | Poison by local antifung/infect/inflamm drugs, slf-hrm, init   | suicide |
| Suicide and intentional self-inflicted injury | T50.902A | Poisoning by unsp drug/meds/biol subst, self-harm, init        | suicide |
| Suicide and intentional self-inflicted injury | T50.992A | Poisoning by oth drug/meds/biol subst, self-harm, init         | suicide |

|                                               |          |                                                              |         |
|-----------------------------------------------|----------|--------------------------------------------------------------|---------|
| Suicide and intentional self-inflicted injury | T51.0X2A | Toxic effect of ethanol, intentional self-harm, init encntr  | suicide |
| Suicide and intentional self-inflicted injury | T54.1X2A | Toxic effect of corrosive organic compounds, self-harm, init | suicide |
| Suicide and intentional self-inflicted injury | T54.92XA | Toxic effect of unsp corrosive substance, self-harm, init    | suicide |
| Suicide and intentional self-inflicted injury | T65.892A | Toxic effect of oth substances, intentional self-harm, init  | suicide |
| Suicide and intentional self-inflicted injury | T71.162A | Asphyxiation due to hanging, intentional self-harm, init     | suicide |

**Table S2:** Inclusion criteria and number of cases meeting each criterion.

| <b>n included</b> | <b>n excluded</b> | <b>% excluded</b> | <b>Reason for Inclusion</b>                                                                            |
|-------------------|-------------------|-------------------|--------------------------------------------------------------------------------------------------------|
| 15,489            |                   |                   | Encounters between 2011-2015 and likely to be in Hamilton County pulled from EHR based on ICD-10 codes |
| 14,884            | 605               | 3.9%              | Non-institutional address (e.g. the hospital or child welfare services)                                |
| 14,759            | 125               | 0.8%              | Non-PO box address                                                                                     |
| 14,618            | 141               | 1.0%              | Geocode precision of "street" or "range"                                                               |
| 14,464            | 154               | 1.1%              | Geocode score > 0.5                                                                                    |
| 13,812            | 652               | 4.5%              | Located within Hamilton County                                                                         |
| 13,176            | 636               | 4.6%              | Did not have an encounter within the previous 7 days for same diagnosis grouping                       |

**Table S3:** Odds ratios and 95% confidence intervals from the case-crossover modeling for the risk of a psychiatric ED visit related to a 10  $\mu\text{g}/\text{m}^3$  increase in  $\text{PM}_{2.5}$  overall and by psychiatric ED visit categories. Results are presented using 30, 45, and 60 day fixed length periods to stratify and select control windows for each case window.

| Category                 | Lag (days) | OR (45 days)      | OR (30 days)      | OR (60 days)      |
|--------------------------|------------|-------------------|-------------------|-------------------|
| All                      | 0          | 1.04 (0.99, 1.09) | 1.03 (0.98, 1.08) | 1.05 (1.00, 1.10) |
|                          | 1          | 1.07 (1.02, 1.12) | 1.06 (1.01, 1.12) | 1.08 (1.03, 1.13) |
|                          | 2          | 1.05 (1.00, 1.10) | 1.06 (1.01, 1.12) | 1.05 (1.01, 1.10) |
|                          | 3          | 1.03 (0.99, 1.08) | 1.05 (1.00, 1.10) | 1.03 (0.98, 1.07) |
| Adjustment Disorder      | 0          | 1.02 (0.84, 1.24) | 1.02 (0.83, 1.25) | 1.03 (0.85, 1.25) |
|                          | 1          | 1.24 (1.02, 1.52) | 1.23 (1.00, 1.51) | 1.24 (1.02, 1.50) |
|                          | 2          | 1.24 (1.02, 1.51) | 1.27 (1.04, 1.55) | 1.25 (1.04, 1.51) |
|                          | 3          | 1.20 (0.99, 1.45) | 1.26 (1.03, 1.52) | 1.22 (1.02, 1.46) |
| Anxiety                  | 0          | 0.97 (0.76, 1.24) | 0.93 (0.73, 1.20) | 1.01 (0.80, 1.28) |
|                          | 1          | 1.03 (0.80, 1.33) | 1.02 (0.79, 1.33) | 1.07 (0.84, 1.37) |
|                          | 2          | 1.03 (0.81, 1.32) | 1.07 (0.83, 1.38) | 1.07 (0.85, 1.36) |
|                          | 3          | 0.97 (0.77, 1.22) | 1.01 (0.80, 1.28) | 1.02 (0.81, 1.27) |
| Bipolar Disorder         | 0          | 1.07 (0.91, 1.26) | 1.06 (0.89, 1.25) | 1.08 (0.92, 1.26) |
|                          | 1          | 1.11 (0.93, 1.31) | 1.07 (0.90, 1.28) | 1.06 (0.90, 1.25) |
|                          | 2          | 1.13 (0.95, 1.33) | 1.06 (0.89, 1.26) | 1.04 (0.88, 1.22) |
|                          | 3          | 1.12 (0.95, 1.31) | 1.07 (0.91, 1.26) | 1.07 (0.91, 1.24) |
| Depressive Disorder      | 0          | 1.03 (0.94, 1.12) | 1.03 (0.94, 1.13) | 1.06 (0.98, 1.15) |
|                          | 1          | 0.98 (0.90, 1.08) | 1.00 (0.91, 1.10) | 1.04 (0.96, 1.14) |
|                          | 2          | 0.99 (0.91, 1.08) | 1.02 (0.93, 1.11) | 1.02 (0.94, 1.11) |
|                          | 3          | 1.01 (0.93, 1.10) | 1.03 (0.95, 1.12) | 1.02 (0.94, 1.10) |
| Externalizing Disorder   | 0          | 1.07 (0.94, 1.21) | 1.09 (0.96, 1.24) | 1.07 (0.95, 1.21) |
|                          | 1          | 1.13 (0.99, 1.29) | 1.15 (1.01, 1.32) | 1.15 (1.01, 1.30) |
|                          | 2          | 1.05 (0.92, 1.19) | 1.06 (0.93, 1.21) | 1.04 (0.92, 1.18) |
|                          | 3          | 0.95 (0.84, 1.08) | 0.97 (0.86, 1.10) | 0.94 (0.84, 1.06) |
| Impulse Control Disorder | 0          | 1.00 (0.88, 1.14) | 0.95 (0.83, 1.08) | 1.02 (0.90, 1.15) |
|                          | 1          | 1.01 (0.88, 1.15) | 0.98 (0.85, 1.12) | 1.01 (0.88, 1.15) |
|                          | 2          | 0.95 (0.84, 1.09) | 0.95 (0.83, 1.09) | 0.94 (0.83, 1.07) |
|                          | 3          | 0.97 (0.86, 1.10) | 0.98 (0.86, 1.11) | 0.96 (0.85, 1.08) |
| Other Mood Disorder      | 0          | 0.98 (0.87, 1.11) | 0.98 (0.87, 1.11) | 0.98 (0.87, 1.10) |
|                          | 1          | 1.11 (0.98, 1.25) | 1.10 (0.97, 1.26) | 1.09 (0.97, 1.23) |
|                          | 2          | 1.15 (1.02, 1.30) | 1.21 (1.06, 1.37) | 1.16 (1.04, 1.31) |
|                          | 3          | 1.10 (0.98, 1.24) | 1.15 (1.02, 1.29) | 1.12 (1.00, 1.25) |
| PTSD                     | 0          | 1.16 (0.92, 1.46) | 1.11 (0.87, 1.42) | 1.09 (0.87, 1.37) |
|                          | 1          | 1.02 (0.79, 1.31) | 0.98 (0.76, 1.27) | 1.00 (0.79, 1.26) |
|                          | 2          | 1.00 (0.79, 1.28) | 1.03 (0.80, 1.32) | 1.01 (0.81, 1.27) |
|                          | 3          | 1.13 (0.89, 1.42) | 1.11 (0.87, 1.41) | 1.03 (0.83, 1.28) |
| Schizophrenia            | 0          | 1.25 (1.00, 1.57) | 1.27 (1.00, 1.61) | 1.23 (0.99, 1.53) |
|                          | 1          | 1.16 (0.91, 1.47) | 1.17 (0.91, 1.50) | 1.16 (0.92, 1.46) |
|                          | 2          | 1.06 (0.84, 1.33) | 1.07 (0.84, 1.36) | 1.08 (0.87, 1.35) |
|                          | 3          | 0.98 (0.77, 1.23) | 0.97 (0.77, 1.23) | 1.01 (0.81, 1.25) |
| Suicidality              | 0          | 1.29 (0.92, 1.81) | 1.19 (0.83, 1.71) | 1.17 (0.83, 1.63) |
|                          | 1          | 1.44 (1.03, 2.02) | 1.32 (0.91, 1.92) | 1.27 (0.91, 1.79) |
|                          | 2          | 1.16 (0.84, 1.62) | 1.10 (0.77, 1.56) | 0.99 (0.72, 1.36) |
|                          | 3          | 1.04 (0.76, 1.43) | 1.04 (0.75, 1.43) | 0.95 (0.70, 1.28) |

**Table S4:** P-values from a Chi-squared test used to determine if community deprivation significantly modified the association between PM<sub>2.5</sub> and psychiatric ED visits by category. Separate associations for high and low community deprivation were estimated for outcomes only when there was significant modification ( $p < 0.05$ ) for at least one exposure lag. Lags represent lagged exposures in days.

| <b>Category</b>          | <b>Lag 3</b> | <b>Lag 2</b> | <b>Lag 1</b> | <b>Lag 0</b> |
|--------------------------|--------------|--------------|--------------|--------------|
| All                      | 0.649        | 0.319        | 0.194        | 0.538        |
| Depressive Disorder      | 0.774        | 0.738        | 0.413        | 0.565        |
| Other Mood Disorder      | 0.619        | 0.867        | 0.393        | 0.617        |
| Adjustment Disorder      | 0.988        | 0.086        | 0.028        | 0.024        |
| Anxiety                  | 0.154        | 0.170        | 0.037        | 0.010        |
| Bipolar Disorder         | 0.299        | 0.430        | 0.172        | 0.340        |
| Externalizing Disorder   | 0.339        | 0.668        | 0.374        | 0.118        |
| PTSD                     | 0.992        | 0.739        | 0.985        | 0.405        |
| Impulse Control Disorder | 0.238        | 0.115        | 0.053        | 0.231        |
| Suicidality              | 0.332        | 0.929        | 0.206        | 0.017        |
| Schizophrenia            | 0.353        | 0.682        | 0.883        | 0.185        |



**Table S5:** Odds ratios and 95% confidence intervals from the case-crossover modeling for the risk of a psychiatric ED visit related to a 10  $\mu\text{g}/\text{m}^3$  increase in  $\text{PM}_{2.5}$  stratified by community deprivation. Separate associations by high and low community deprivation were estimated for psychiatric ED visit categories that showed a significant effect modification ( $p < 0.05$ ) for at least one exposure lag, in accord with a pre-specified selection criterion.

| Category            | Lag (days) | Deprivation Index | Odds Ratio | Lower 95% Confidence Interval Bound | Upper 95% Confidence Interval Bound |
|---------------------|------------|-------------------|------------|-------------------------------------|-------------------------------------|
| Adjustment Disorder | 0          | low               | 1.25       | 0.96                                | 1.62                                |
|                     |            | high              | 0.82       | 0.62                                | 1.08                                |
|                     | 1          | low               | 1.50       | 1.16                                | 1.93                                |
|                     |            | high              | 1.00       | 0.76                                | 1.33                                |
|                     | 2          | low               | 1.45       | 1.11                                | 1.88                                |
|                     |            | high              | 1.05       | 0.80                                | 1.39                                |
| 3                   | low        | 1.20              | 0.92       | 1.56                                |                                     |
|                     | high       | 1.20              | 0.92       | 1.56                                |                                     |
| Anxiety             | 0          | low               | 0.77       | 0.57                                | 1.05                                |
|                     |            | high              | 1.39       | 0.97                                | 2.00                                |
|                     | 1          | low               | 0.85       | 0.62                                | 1.17                                |
|                     |            | high              | 1.39       | 0.96                                | 2.01                                |
|                     | 2          | low               | 0.92       | 0.69                                | 1.24                                |
|                     |            | high              | 1.28       | 0.86                                | 1.90                                |
| 3                   | low        | 0.87              | 0.65       | 1.15                                |                                     |
|                     | high       | 1.22              | 0.83       | 1.80                                |                                     |
| Suicidality         | 0          | low               | 0.93       | 0.60                                | 1.45                                |
|                     |            | high              | 1.98       | 1.22                                | 3.23                                |
|                     | 1          | low               | 1.20       | 0.77                                | 1.87                                |
|                     |            | high              | 1.77       | 1.11                                | 2.82                                |
|                     | 2          | low               | 1.15       | 0.75                                | 1.75                                |
|                     |            | high              | 1.18       | 0.74                                | 1.89                                |
| 3                   | low        | 1.18              | 0.79       | 1.75                                |                                     |
|                     | high       | 0.87              | 0.54       | 1.42                                |                                     |
